# Supplementary material
Source: PubMed Central journal article supplement (PMC3295550)

# Age-related Prognostic Impact of Different Types of *DNMT3A* Mutations in Adults with Primary Cytogenetically Normal Acute Myeloid Leukemia

Marcucci, et al

APPENDIX: *DNMT3A* mutations in adult primary CN-AML

## Supplemental Methods

### ***Definition of Clinical Endpoints***

Complete remission (CR) was defined as recovery of morphologically normal bone marrow and blood counts (ie, neutrophils  $\geq 1,500/\mu\text{l}$  and platelets  $>100,000/\mu\text{l}$ ), and no circulating leukemic blasts or evidence of extramedullary leukemia. Disease-free survival (DFS) was measured from the date of CR until the date of relapse or death; patients alive and in CR were censored at last follow-up. Overall survival (OS) was measured from the date of study entry until the date of death, and patients alive at last follow-up were censored.

### ***Treatment***

Patients with cytogenetically normal acute myeloid leukemia (CN-AML) younger than 60 years were treated on Cancer and Leukemia Group B (CALGB) trials 9621 or 19808. Patients enrolled on CALGB 19808 (n=92) were randomly assigned to receive induction chemotherapy with cytarabine, daunorubicin, and etoposide with or without PSC-833 (valsopodar), a multidrug resistance protein inhibitor.<sup>1</sup> On achievement of CR, patients were assigned to intensification with high-dose cytarabine and etoposide for stem-cell mobilization followed by myeloablative treatment with busulfan and etoposide supported by autologous peripheral blood stem-cell transplantation. Patients enrolled on CALGB 9621 (n=89) were treated similarly to those on CALGB 19808, as previously reported.<sup>2,3</sup> Older patients ( $\geq 60$  years) were all treated with cytarabine/daunorubicin-based induction therapy followed by cytarabine-based consolidation therapy. Patients on CALGB 8525 (n=24) were treated with induction chemotherapy consisting of cytarabine in combination with daunorubicin and were randomly assigned to consolidation with different doses of cytarabine followed by maintenance treatment.<sup>4</sup> Patients on CALGB 8923 (n=21) were treated with induction chemotherapy consisting of cytarabine in combination with

daunorubicin and were randomly assigned to receive postremission therapy with cytarabine alone or in combination with mitoxantrone.<sup>5</sup> Patients on CALGB 9420 (n=5) and 9720 (n=110) received induction chemotherapy consisting of cytarabine in combination with daunorubicin and etoposide, with (CALGB 9420) or with/without (CALGB 9720) the multidrug resistance protein modulator PSC-833.<sup>6,7</sup> Patients on CALGB 9420 received postremission therapy with cytarabine (2 g/m<sup>2</sup>/d) alone, and patients on CALGB 9720 received a single cytarabine/daunorubicin consolidation course and were then randomly assigned to low-dose recombinant interleukin-2 maintenance therapy or none.<sup>8</sup> Patients on CALGB 10201 (n=74) received induction chemotherapy consisting of cytarabine and daunorubicin, with or without the *BCL2* antisense oblimersen sodium. The consolidation regimen included two cycles of cytarabine (2 g/m<sup>2</sup>/d) with or without oblimersen.<sup>9</sup>

When the outcomes of patients studied for *DNMT3A* mutations were compared with patients enrolled on the relevant CALGB protocols who were not included in our study (n=473), differences in outcome did not reach statistical significance.

### **Multivariable Models**

Multivariable logistic regression models were generated for attainment of CR, and multivariable proportional hazards models were constructed for DFS and OS, using a limited backwards elimination procedure. Variables that were considered for univariable analyses in addition to *DNMT3A* mutations were age, sex, race, hemoglobin, platelet count, white blood cell count (WBC), mutation status of *NPM1*, *CEBPA*, *WT1*, *TET2*, *IDH1* and *IDH2*, presence/absence of *FLT3*-internal tandem duplications (*FLT3*-ITD) and tyrosine kinase domain mutations (*FLT3*-TKD), and *MLL* partial tandem duplications (*MLL*-PTD), and *BAALC* and *ERG* expression status (high v low). Variables significant at  $\alpha=.20$  from the univariable analyses were considered for multivariable analyses. For the time-to-event endpoints, the proportional hazards assumption was checked for each variable individually. All models considering both age groups were

adjusted for an age-group effect ( $\geq 60$  years *v*  $< 60$  years).

### ***Gene- and microRNA-Expression Profiling***

To establish a signature of genes differentially expressed between *DNMT3A*-mutated and *DNMT3A* wild-type (*DNMT3A*-wt) patients, we evaluated gene-expression profiles obtained using Affymetrix HG-U133plus2.0 oligonucleotide microarrays (Affymetrix, Santa Clara, CA). Details regarding sample preparation, array hybridization, and signal computation have been published previously.<sup>10</sup> A total of 24,995 probe-sets that passed a filtering criterion were analyzed. Normalized expression values were compared between *DNMT3A*-mutated (n=92) and *DNMT3A*-wt (n=186) patients, and a univariable significance level of .001 was used to identify differentially expressed probe-sets. A global test of significance based on a permutation procedure was performed to determine whether or not the number of differentially expressed probe sets was more than expected by chance; if not, no signature is reported for the comparison.

To derive microRNA expression signatures associated with *DNMT3A* mutations, younger and older patients with cytogenetically normal acute myeloid leukemia (CN-AML) were analyzed separately in order to avoid confounding batch effects. For younger CN-AML patient samples, the Ohio State University custom microRNA array version 3.0 platform was used. Details regarding sample preparation, array hybridization, and signal computation have been published previously.<sup>10</sup> 305 unique human probes that passed filtering criteria were analyzed. Normalized expression values were compared between *DNMT3A*-mutated (n=29) and *DNMT3A*-wt (n=53) patients, and a univariable significance level of .005 was used to identify differentially expressed probes. For older CN-AML patient samples, the Ohio State University custom microRNA array version 4.0 platform was used. Details regarding sample preparation, array hybridization, and signal computation have been published previously.<sup>11</sup> Four-hundred-sixty unique human probes

that passed filtering criteria were analyzed. Normalized expression values were compared between *DNMT3A*-mutated (n=53) and *DNMT3A*-wt (n=125) patients, and a univariable significance level of .005 was used to identify differentially expressed probes. For each comparison, a global test of significance based on a permutation procedure was performed to determine whether or not the number of differentially expressed probes was more than expected by chance; if not, no signature is reported for the comparison.

We implemented compound covariate prediction using leave-one-out cross-validation to predict *DNMT3A* mutation status of patients from gene- and microRNA-expression profiles.<sup>12</sup> Each patient, one at a time, was removed from analysis and the expression profiles of the remaining patients were compared to derive a gene- or microRNA-expression signature. A compound covariate was then computed for each patient based on this signature: the value of the compound covariate for patient  $i$  was  $c_i = \sum w_j x_{ij}$ , where  $x_{ij}$  is the log-transformed expression value for probe  $j$  in patient  $i$  and  $w_j$  is the weight assigned to probe  $j$  (in this case,  $w_j$  was set equal to the two-sample t-statistic for the comparison of the *DNMT3A*-mutated and *DNMT3A*-wt groups for probe  $j$ ). The sum is over all  $j$  probes included in the signature. A classification threshold was computed to be the midpoint of the means of the compound covariate values for the *DNMT3A*-mutated and *DNMT3A*-wt groups. The compound covariate was then calculated for the left-out patient and its *DNMT3A* status was predicted by comparing its value to the classification threshold. This entire process was repeated until every patient had been left out one time and its mutation status predicted. The overall accuracy of the prediction is indicated, as are the sensitivity and specificity for prediction of *DNMT3A* mutations. All microarray analyses were performed using BRB-ArrayTools Version 3.8.1, developed by Richard Simon, DSc, and Amy Peng Lam.

**Supplemental References**

1. Kolitz JE, George SL, Marcucci G, et al: P-glycoprotein inhibition using valspodar (PSC-833) does not improve outcomes for patients under age 60 years with newly diagnosed acute myeloid leukemia: Cancer and Leukemia Group B study 19808. *Blood* 116:1413-1421, 2010
2. Kolitz JE, George SL, Dodge RK, et al: Dose escalation studies of cytarabine, daunorubicin, and etoposide with and without multidrug resistance modulation with PSC-833 in untreated adults with acute myeloid leukemia younger than 60 years: Final induction results of Cancer and Leukemia Group B Study 9621. *J Clin Oncol* 22:4290-4301, 2004
3. Kolitz JE, George SL, Barrier R, et al: A novel post-remission consolidation regimen for patients with acute myeloid leukemia (AML) < 60 years old with normal or unfavorable cytogenetics: Results from CALGB 9621. *Blood* 102:175a, 2003 (abstr 609)
4. Mayer RJ, Davis RB, Schiffer CA, et al: Intensive postremission chemotherapy in adults with acute myeloid leukemia. *N Engl J Med* 331:896-903, 1994
5. Stone R, Berg D, George S, et al: Postremission therapy in older patients with de novo acute myeloid leukemia: A randomized trial comparing mitoxantrone and intermediate-dose cytarabine with standard-dose cytarabine. *Blood* 98:548-553, 2001
6. Lee EJ, George SL, Caligiuri M, et al: Parallel phase I studies of daunorubicin given with cytarabine and etoposide with or without the multidrug resistance modulator PSC-833 in previously untreated patients 60 years of age or older with acute myeloid leukemia: Results of Cancer and Leukemia Group B study 9420. *J Clin Oncol* 17:2831-2839, 1999
7. Baer MR, George SL, Dodge RK, et al: Phase 3 study of the multidrug resistance modulator PSC-833 in previously untreated patients 60 years of age and older with

- acute myeloid leukemia: Cancer and Leukemia Group B Study 9720. *Blood* 100:1224-1232, 2002
8. Baer MR, George SL, Caligiuri MA, et al. Low-dose interleukin-2 immunotherapy does not improve outcome of patients age 60 years and older with acute myeloid leukemia in first complete remission: Cancer and Leukemia Group B study 9720. *J Clin Oncol* 26:4934-4939, 2008
  9. Marcucci G, Moser B, Blum W, et al: A phase III randomized trial of intensive induction and consolidation chemotherapy  $\pm$  oblimersen, a proapoptotic Bcl-2 antisense oligonucleotide in untreated acute myeloid leukemia patients >60 years old. *J Clin Oncol* 25:360s, 2007 (suppl; abstr 7012)
  10. Marcucci G, Radmacher MD, Maharry K, et al: MicroRNA expression in cytogenetically normal acute myeloid leukemia. *N Engl J Med* 358:1919-1928, 2008
  11. Metzeler KH, Maharry K, Radmacher MD, et al: TET2 mutations improve the new European LeukemiaNet risk classification of acute myeloid leukemia: A Cancer and Leukemia Group B study. *J Clin Oncol* 29:1373-1381, 2011
  12. Radmacher MD, McShane LM, Simon R: A paradigm for class prediction using gene expression profiles. *J Comput Biol* 9:505-511, 2002
  13. Ley TJ, Ding L, Walter MJ, et al: *DNMT3A* mutations in acute myeloid leukemia. *N Engl J Med* 363:2424-2433, 2010
  14. Döhner H, Estey EH, Amadori S, et al: Diagnosis and management of acute myeloid leukemia in adults: Recommendations from an international expert panel, on behalf of the European LeukemiaNet. *Blood* 115:453-474, 2010

**Supplemental Tables****Table A1.** DNMT3A Mutations Detected in 415 Patients with Primary Cytogenetically Normal Acute Myeloid Leukemia

| Mutations                                                | No.             |
|----------------------------------------------------------|-----------------|
| Patients with any DNMT3A mutations                       | 142             |
| Total number of DNMT3A mutations                         | 148             |
| Mutations at codon R882                                  | 92              |
| - R882H                                                  | 49*             |
| - R882C                                                  | 36 <sup>†</sup> |
| - R882P                                                  | 3               |
| - R882S                                                  | 3               |
| - R882G                                                  | 1 <sup>‡</sup>  |
| Nonsense mutations                                       | 8               |
| Frame shift mutations                                    | 9 <sup>§</sup>  |
| Mutations affecting splice sites                         | 5 <sup>  </sup> |
| Missense mutations not affecting codon R882 <sup>¶</sup> | 32 <sup>#</sup> |
| Short in-frame deletions                                 | 2               |

\* One patient had both an R882H mutation and a splice site mutation.

<sup>†</sup> One patient had both an R882C mutation and a non-R882 missense mutation.

<sup>‡</sup> This patient had both an R882G mutation and a frame shift mutation.

<sup>§</sup> One patient had both a frame shift mutation and a non-R882 missense mutation.

<sup>||</sup> One patient had both a splice site mutation and a non-R882 missense mutation.

<sup>¶</sup> Two of these mutations were demonstrated by Ley et al<sup>13</sup> to be somatically acquired mutations.

<sup>#</sup> One patient had two different non-R882 missense mutations.

**Table A2.** Comparison of Molecular Characteristics of Younger (<60 Years) Patients with Primary Cytogenetically Normal Acute Myeloid Leukemia with R882-DNMT3A Mutations Versus DNMT3A Wild Type.

| Characteristic                           | R882-DNMT3A Mutated (n=47) | DNMT3A Wild Type (n=117) | P*     |
|------------------------------------------|----------------------------|--------------------------|--------|
| <i>NPM1</i> , no. (%)                    |                            |                          | .02    |
| Mutated                                  | 36 (77)                    | 66 (56)                  |        |
| Wild type                                | 11 (23)                    | 51 (44)                  |        |
| <i>FLT3</i> -ITD, no. (%)                |                            |                          | .03    |
| Present                                  | 24 (51)                    | 38 (32)                  |        |
| Absent                                   | 23 (49)                    | 79 (68)                  |        |
| <i>CEBPA</i> , no. (%)                   |                            |                          | < .001 |
| Mutated                                  | 2 (4)                      | 33 (28)                  |        |
| Single mutated                           | 2                          | 10                       |        |
| Double mutated                           | 0                          | 23                       |        |
| Wild type                                | 45 (96)                    | 84 (72)                  |        |
| ELN Genetic Group <sup>†</sup> , no. (%) |                            |                          | .06    |
| Favorable                                | 19 (40)                    | 68 (58)                  |        |
| Intermediate-I                           | 28 (60)                    | 49 (42)                  |        |
| <i>FLT3</i> -TKD, no. (%)                |                            |                          | 1.00   |
| Present                                  | 4 (9)                      | 10 (9)                   |        |
| Absent                                   | 43 (91)                    | 105 (91)                 |        |
| <i>WT1</i> , no. (%)                     |                            |                          | .02    |
| Mutated                                  | 1 (2)                      | 19 (16)                  |        |
| Wild type                                | 46 (98)                    | 98 (84)                  |        |
| <i>TET2</i> , no. (%)                    |                            |                          | .49    |
| Mutated                                  | 6 (13)                     | 21 (18)                  |        |
| Wild type                                | 41 (87)                    | 94 (82)                  |        |
| <i>MLL</i> -PTD, no. (%)                 |                            |                          | 1.00   |
| Present                                  | 3 (6)                      | 8 (7)                    |        |
| Absent                                   | 44 (94)                    | 109 (93)                 |        |
| <i>IDH1</i> , no. (%)                    |                            |                          | .16    |
| R132 Mutated                             | 7 (15)                     | 9 (8)                    |        |
| Wild type                                | 39 (85)                    | 107 (92)                 |        |
| <i>IDH2</i> , no. (%)                    |                            |                          | .16    |
| Mutated                                  | 7 (15)                     | 9 (8)                    |        |
| Codon R140                               | 5                          | 8                        |        |
| Codon R172                               | 2                          | 1                        |        |
| Wild type                                | 39 (85)                    | 107 (92)                 |        |



| Characteristic                                       | R882- <i>DNMT3A</i><br>Mutated<br>(n=47) | <i>DNMT3A</i><br>Wild Type<br>(n=117) | <i>P</i> * |
|------------------------------------------------------|------------------------------------------|---------------------------------------|------------|
| <i>ERG</i> expression group <sup>‡</sup> no. (%)     |                                          |                                       | .04        |
| High                                                 | 23 (68)                                  | 37 (45)                               |            |
| Low                                                  | 11 (32)                                  | 45 (55)                               |            |
| <i>BAALC</i> expression group <sup>‡</sup> , no. (%) |                                          |                                       | .17        |
| High                                                 | 14 (39)                                  | 51 (54)                               |            |
| Low                                                  | 22 (61)                                  | 43 (46)                               |            |

Abbreviations: *FLT3*-ITD, internal tandem duplication of the *FLT3* gene; ELN, European LeukemiaNet; *FLT3*-TKD, tyrosine kinase domain mutation in the *FLT3* gene; *MLL*-PTD, partial tandem duplication of the *MLL* gene.

\* *P*-values for categorical variables are from Fisher's exact test, *P*-values for continuous variables are from the Wilcoxon rank sum test.

† The ELN Favorable genetic group includes patients with mutated *CEBPA* and/or mutated *NPM1* without *FLT3*-ITD.<sup>14</sup> The ELN Intermediate-I genetic group comprises the remaining CN-AML patients, who had wild-type *CEBPA*, and wild type *NPM1* with or without *FLT3*-ITD or mutated *NPM1* with *FLT3*-ITD.

‡ The median expression value was used as a cut point.

**Table A3.** Comparison of Molecular Characteristics in Younger (<60 Years) Patients with Primary Cytogenetically Normal Acute Myeloid Leukemia with non-R882-DNMT3A Mutations Versus DNMT3A Wild Type.

| Characteristic                           | non-R882-DNMT3A<br>Mutated<br>(n=17) | DNMT3A<br>Wild Type<br>(n=117) | P*   |
|------------------------------------------|--------------------------------------|--------------------------------|------|
| <i>NPM1</i> , no. (%)                    |                                      |                                | .02  |
| Mutated                                  | 15 (88)                              | 66 (56)                        |      |
| Wild type                                | 2 (12)                               | 51 (44)                        |      |
| <i>FLT3</i> -ITD, no. (%)                |                                      |                                | .11  |
| Present                                  | 9 (53)                               | 38 (32)                        |      |
| Absent                                   | 8 (47)                               | 79 (68)                        |      |
| <i>CEBPA</i> , no. (%)                   |                                      |                                | .07  |
| Mutated                                  | 1 (6)                                | 33 (28)                        |      |
| Single mutated                           | 0                                    | 10                             |      |
| Double mutated                           | 1                                    | 23                             |      |
| Wild type                                | 16 (94)                              | 84 (72)                        |      |
| ELN Genetic Group <sup>†</sup> , no. (%) |                                      |                                | .20  |
| Favorable                                | 7 (41)                               | 68 (58)                        |      |
| Intermediate-I                           | 10 (59)                              | 49 (42)                        |      |
| <i>FLT3</i> -TKD, no. (%)                |                                      |                                | .60  |
| Present                                  | 0 (0)                                | 10 (9)                         |      |
| Absent                                   | 14 (100)                             | 105 (91)                       |      |
| <i>WT1</i> , no. (%)                     |                                      |                                | 1.00 |
| Mutated                                  | 2 (12)                               | 19 (16)                        |      |
| Wild type                                | 15 (88)                              | 98 (84)                        |      |
| <i>TET2</i> , no. (%)                    |                                      |                                | .74  |
| Mutated                                  | 4 (24)                               | 21 (18)                        |      |
| Wild type                                | 13 (76)                              | 94 (82)                        |      |
| <i>MLL</i> -PTD, no. (%)                 |                                      |                                | .60  |
| Present                                  | 0 (0)                                | 8 (7)                          |      |
| Absent                                   | 17 (100)                             | 109 (93)                       |      |
| <i>IDH1</i> , no. (%)                    |                                      |                                | .06  |
| R132 Mutated                             | 4 (24)                               | 9 (8)                          |      |
| Wild type                                | 13 (76)                              | 107 (92)                       |      |
| <i>IDH2</i> , no. (%)                    |                                      |                                | .06  |
| Mutated                                  | 4 (24)                               | 9 (8)                          |      |
| Codon R140                               | 4                                    | 8                              |      |
| Codon R172                               | 0                                    | 1                              |      |
| Wild type                                | 13 (76)                              | 107 (92)                       |      |

| Characteristic                                       | non-R882- <i>DNMT3A</i><br>Mutated<br>(n=17) | <i>DNMT3A</i><br>Wild Type<br>(n=117) | <i>P</i> * |
|------------------------------------------------------|----------------------------------------------|---------------------------------------|------------|
| <i>ERG</i> expression group <sup>‡</sup> , no. (%)   |                                              |                                       | .57        |
| High                                                 | 7 (54)                                       | 37 (45)                               |            |
| Low                                                  | 6 (46)                                       | 45 (55)                               |            |
| <i>BAALC</i> expression group <sup>‡</sup> , no. (%) |                                              |                                       | 1.00       |
| High                                                 | 5 (56)                                       | 51 (54)                               |            |
| Low                                                  | 4 (44)                                       | 43 (46)                               |            |

Abbreviations: *FLT3*-ITD, internal tandem duplication of the *FLT3* gene; ELN, European LeukemiaNet; *FLT3*-TKD, tyrosine kinase domain mutation in the *FLT3* gene; *MLL*-PTD, partial tandem duplication of the *MLL* gene.

\* *P*-values for categorical variables are from Fisher's exact test, *P*-values for continuous variables are from the Wilcoxon rank sum test.

† The ELN Favorable genetic group includes patients with mutated *CEBPA* and/or mutated *NPM1* without *FLT3*-ITD.<sup>14</sup> The ELN Intermediate-I genetic group comprises the remaining CN-AML patients, who had wild-type *CEBPA*, and wild type *NPM1* with or without *FLT3*-ITD or mutated *NPM1* with *FLT3*-ITD.

‡ The median expression value was used as a cut point.

**Table A4.** Comparison of Molecular Characteristics in Older ( $\geq 60$  Years) Patients with Primary Cytogenetically Normal Acute Myeloid Leukemia with R882-DNMT3A Mutations Versus DNMT3A Wild Type.

| Characteristic                           | R882-DNMT3A-Mutated (n=45) | DNMT3A Wild Type (n=156) | P*   |
|------------------------------------------|----------------------------|--------------------------|------|
| <i>NPM1</i> , no. (%)                    |                            |                          | .09  |
| Mutated                                  | 30 (67)                    | 80 (51)                  |      |
| Wild type                                | 15 (33)                    | 76 (49)                  |      |
| <i>FLT3</i> -ITD, no. (%)                |                            |                          | .15  |
| Present                                  | 19 (42)                    | 47 (30)                  |      |
| Absent                                   | 26 (58)                    | 109 (70)                 |      |
| <i>CEBPA</i> , no. (%)                   |                            |                          | .14  |
| Mutated                                  | 3 (7)                      | 25 (16)                  |      |
| Single mutated                           | 1                          | 16                       |      |
| Double mutated                           | 2                          | 9                        |      |
| Wild type                                | 42 (93)                    | 131 (84)                 |      |
| ELN Genetic Group <sup>†</sup> , no. (%) |                            |                          | .39  |
| Favorable                                | 17 (38)                    | 72 (46)                  |      |
| Intermediate-I                           | 28 (62)                    | 84 (54)                  |      |
| <i>FLT3</i> -TKD, no. (%)                |                            |                          | .74  |
| Present                                  | 2 (5)                      | 11 (7)                   |      |
| Absent                                   | 42 (95)                    | 140 (93)                 |      |
| <i>WT1</i> , no. (%)                     |                            |                          | 1.00 |
| Mutated                                  | 2 (4)                      | 9 (6)                    |      |
| Wild type                                | 43 (96)                    | 147 (94)                 |      |
| <i>TET2</i> , no. (%)                    |                            |                          | 1.00 |
| Mutated                                  | 13 (30)                    | 46 (30)                  |      |
| Wild type                                | 31 (70)                    | 108 (70)                 |      |
| <i>MLL</i> -PTD, no. (%)                 |                            |                          | .69  |
| Present                                  | 3 (8)                      | 7 (6)                    |      |
| Absent                                   | 33 (92)                    | 119 (94)                 |      |
| <i>IDH1</i> , no. (%)                    |                            |                          | .44  |
| R132 Mutated                             | 7 (16)                     | 17 (11)                  |      |
| Wild type                                | 38 (84)                    | 139 (89)                 |      |
| <i>IDH2</i> , no. (%)                    |                            |                          | .44  |
| Mutated                                  | 9 (20)                     | 42 (27)                  |      |
| Codon R140                               | 7                          | 36                       |      |
| Codon R172                               | 2                          | 6                        |      |
| Wild type                                | 36 (80)                    | 114 (73)                 |      |

| Characteristic                                       | R882- <i>DNMT3A</i> -<br>Mutated<br>(n=45) | <i>DNMT3A</i><br>Wild Type<br>(n=156) | <i>P</i> * |
|------------------------------------------------------|--------------------------------------------|---------------------------------------|------------|
| <i>ERG</i> expression group <sup>‡</sup> , no. (%)   |                                            |                                       | .69        |
| High                                                 | 19 (58)                                    | 55 (53)                               |            |
| Low                                                  | 14 (42)                                    | 49 (47)                               |            |
| <i>BAALC</i> expression group <sup>‡</sup> , no. (%) |                                            |                                       | .84        |
| High                                                 | 15 (48)                                    | 53 (51)                               |            |
| Low                                                  | 16 (52)                                    | 50 (49)                               |            |

Abbreviations: *FLT3*-ITD, internal tandem duplication of the *FLT3* gene; ELN, European LeukemiaNet; *FLT3*-TKD, tyrosine kinase domain mutation in the *FLT3* gene; *MLL*-PTD, partial tandem duplication of the *MLL* gene.

\* *P*-values for categorical variables are from Fisher's exact test, *P*-values for continuous variables are from the Wilcoxon rank sum test.

† The ELN Favorable genetic group includes patients with mutated *CEBPA* and/or mutated *NPM1* without *FLT3*-ITD.<sup>14</sup> The ELN Intermediate-I genetic group comprises the remaining CN-AML patients, who had wild-type *CEBPA*, and wild type *NPM1* with or without *FLT3*-ITD or mutated *NPM1* with *FLT3*-ITD.

‡ The median expression value was used as a cut point.

**Table A5.** Comparison of Molecular Characteristics in Older ( $\geq 60$  Years) Patients with Primary Cytogenetically Normal Acute Myeloid Leukemia with non-R882-DNMT3A Mutations Versus DNMT3A Wild Type.

| Characteristic                           | non-R882-DNMT3A<br>Mutated<br>(n=33) | DNMT3A<br>Wild Type<br>(n=156) | P*   |
|------------------------------------------|--------------------------------------|--------------------------------|------|
| <i>NPM1</i> , no. (%)                    |                                      |                                | .003 |
| Mutated                                  | 26 (79)                              | 80 (51)                        |      |
| Wild type                                | 7 (21)                               | 76 (49)                        |      |
| <i>FLT3</i> -ITD, no. (%)                |                                      |                                | 1.00 |
| Present                                  | 10 (30)                              | 47 (30)                        |      |
| Absent                                   | 23 (70)                              | 109 (70)                       |      |
| <i>CEBPA</i> , no. (%)                   |                                      |                                | .05  |
| Mutated                                  | 1 (3)                                | 25 (16)                        |      |
| Single mutated                           | 1                                    | 16                             |      |
| Double mutated                           | 0                                    | 9                              |      |
| Wild type                                | 32 (97)                              | 131 (84)                       |      |
| ELN Genetic Group <sup>†</sup> , no. (%) |                                      |                                | .70  |
| Favorable                                | 17 (52)                              | 72 (46)                        |      |
| Intermediate-I                           | 16 (48)                              | 84 (54)                        |      |
| <i>FLT3</i> -TKD, no. (%)                |                                      |                                | .48  |
| Present                                  | 4 (12)                               | 11 (7)                         |      |
| Absent                                   | 29 (88)                              | 140 (93)                       |      |
| <i>WT1</i> , no. (%)                     |                                      |                                | .07  |
| Mutated                                  | 5 (15)                               | 9 (6)                          |      |
| Wild type                                | 28 (85)                              | 147 (94)                       |      |
| <i>TET2</i> , no. (%)                    |                                      |                                | .67  |
| Mutated                                  | 8 (24)                               | 46 (30)                        |      |
| Wild type                                | 25 (76)                              | 108 (70)                       |      |
| <i>MLL</i> -PTD, no. (%)                 |                                      |                                | 1.00 |
| Present                                  | 1 (4)                                | 7 (6)                          |      |
| Absent                                   | 22 (96)                              | 119 (94)                       |      |
| <i>IDH1</i> , no. (%)                    |                                      |                                | .76  |
| R132 Mutated                             | 4 (13)                               | 17 (11)                        |      |
| Wild type                                | 28 (87)                              | 139 (89)                       |      |
| <i>IDH2</i> , no. (%)                    |                                      |                                | .11  |
| Mutated                                  | 4 (13)                               | 42 (27)                        |      |
| Codon R140                               | 2                                    | 36                             |      |
| Codon R172                               | 2                                    | 6                              |      |
| Wild type                                | 28 (87)                              | 114 (73)                       |      |

| Characteristic                                       | non-R882- <i>DNMT3A</i><br>Mutated<br>(n=33) | <i>DNMT3A</i><br>Wild Type<br>(n=156) | <i>P</i> * |
|------------------------------------------------------|----------------------------------------------|---------------------------------------|------------|
| <i>ERG</i> expression group <sup>‡</sup> , no. (%)   |                                              |                                       | .15        |
| High                                                 | 7 (33)                                       | 55 (53)                               |            |
| Low                                                  | 14 (67)                                      | 49 (47)                               |            |
| <i>BAALC</i> expression group <sup>‡</sup> , no. (%) |                                              |                                       | .81        |
| High                                                 | 11 (55)                                      | 53 (51)                               |            |
| Low                                                  | 9 (45)                                       | 50 (49)                               |            |

Abbreviations: *FLT3*-ITD, internal tandem duplication of the *FLT3* gene; ELN, European LeukemiaNet; *FLT3*-TKD, tyrosine kinase domain mutation in the *FLT3* gene; *MLL*-PTD, partial tandem duplication of the *MLL* gene.

\* *P*-values for categorical variables are from Fisher's exact test, *P*-values for continuous variables are from the Wilcoxon rank sum test.

† The ELN Favorable genetic group includes patients with mutated *CEBPA* and/or mutated *NPM1* without *FLT3*-ITD.<sup>14</sup> The ELN Intermediate-I genetic group comprises the remaining CN-AML patients, who had wild-type *CEBPA*, wild type *NPM1* with or without *FLT3*-ITD or mutated *NPM1* with *FLT3*-ITD.

‡ The median expression value was used as a cut point.

**Table A6.** *DNMT3A* Mutation-Associated Gene-Expression Signatures

*see separate Excel file*

**Table A7.** *DNMT3A* Mutation-Associated microRNA-Expression Signatures

*see separate Excel file*



**Supplemental Figure Legend**

**Fig. A1:** Clinical outcome for patients with and without *DNMT3A* mutations, according to age group. (A) Disease-free survival and (B) overall survival of patients aged <60 years. (C) Disease-free survival and (D) overall survival of patients aged ≥60 years.

**Supplemental Figure**

**Figure A1:**

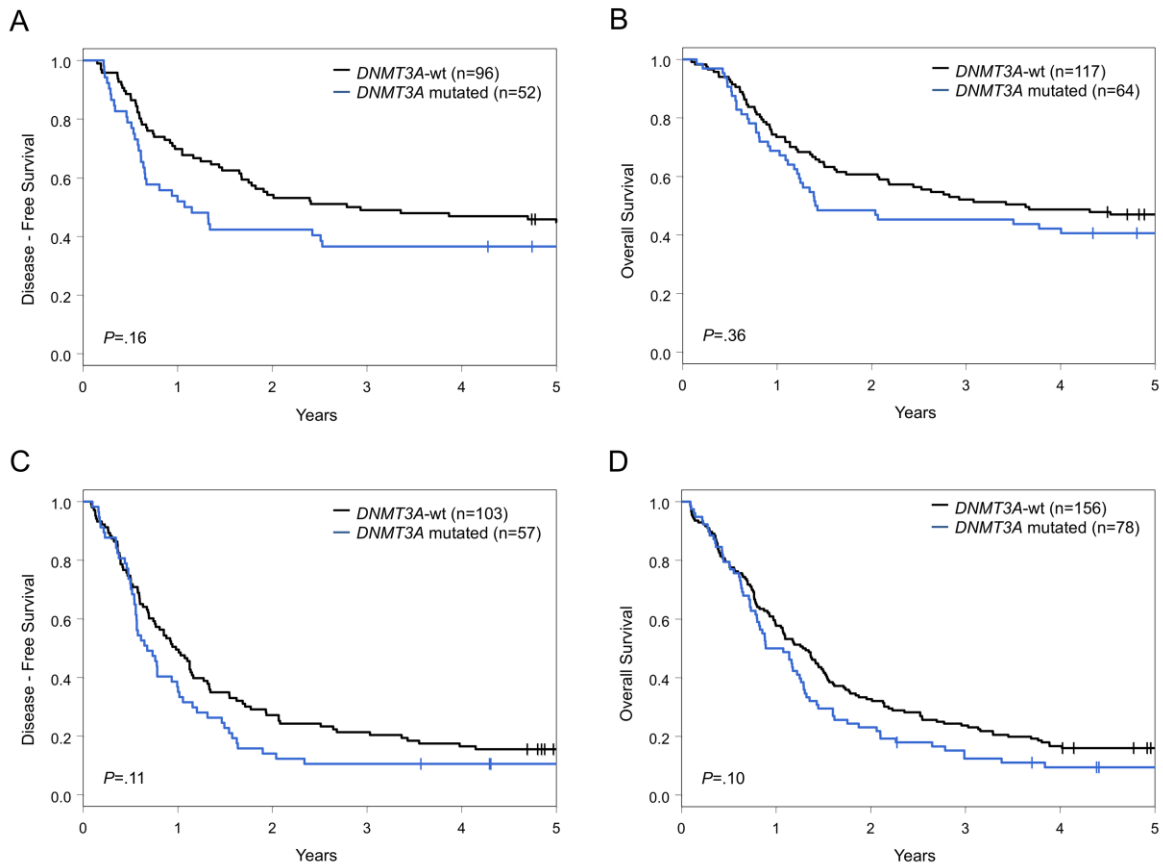

Supplement: supp_JCO.2011.39.2092_392092_Supp_APPENDIX.pdf [file supp_JCO.2011.39.2092_392092_Supp_APPENDIX.pdf]
